# Supplementary material for: A peptide‐display protein scaffold to facilitate single molecule force studies of aggregation‐prone peptides
Source: PubMed Central journal article supplement (PMC6032367; doi:10.1002/pro.3386), 2018-03-10
Supplement: PRO-27-1205-s001.pdf [file PRO-27-1205-s001.pdf]

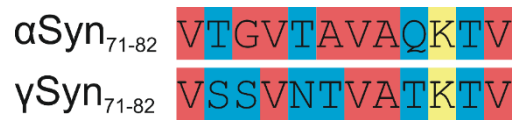

**Figure S2. Sequence alignment of the central NAC regions of  $\alpha$ - and  $\gamma$ -synuclein.**

Residue properties are colour coded: red (hydrophobic), blue (polar) and yellow (charged).

The sequences are highly homologous, 7/12 residues are identical and 3 of the 5 substitutions are conservative.

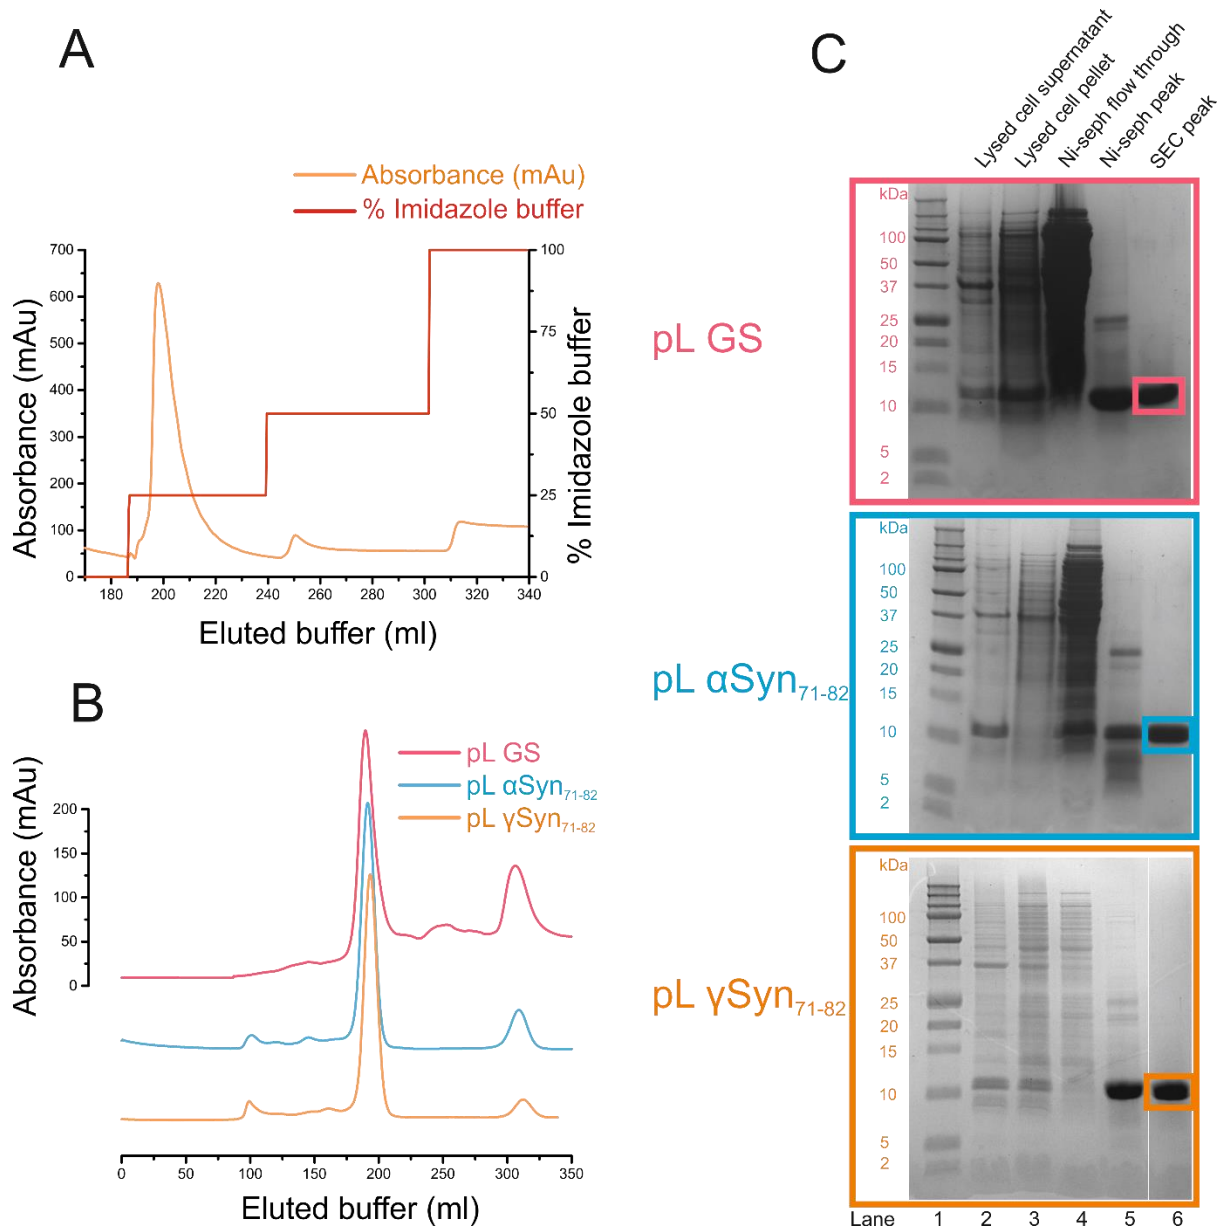

**Figure S3. Two-step purification of pL variants.**

(A) Typical elution profile for the Ni<sup>2+</sup>-Sepharose affinity chromatography step (pL  $\gamma$ Syn<sub>71-82</sub>). The protein eluted in 25 % imidazole is visualised in the fifth lane in each gel in (C). (B) Elution profiles of the size exclusion chromatography step (SEC). The final purified protein after SEC is shown in lane 6 of the gels shown in (C), highlighted with a coloured box. (C) SDS-polyacrylamide gels following the purification of pL GS (pink), pL  $\alpha$ Syn<sub>71-82</sub> (blue) and pL  $\gamma$ Syn<sub>71-82</sub> (orange).

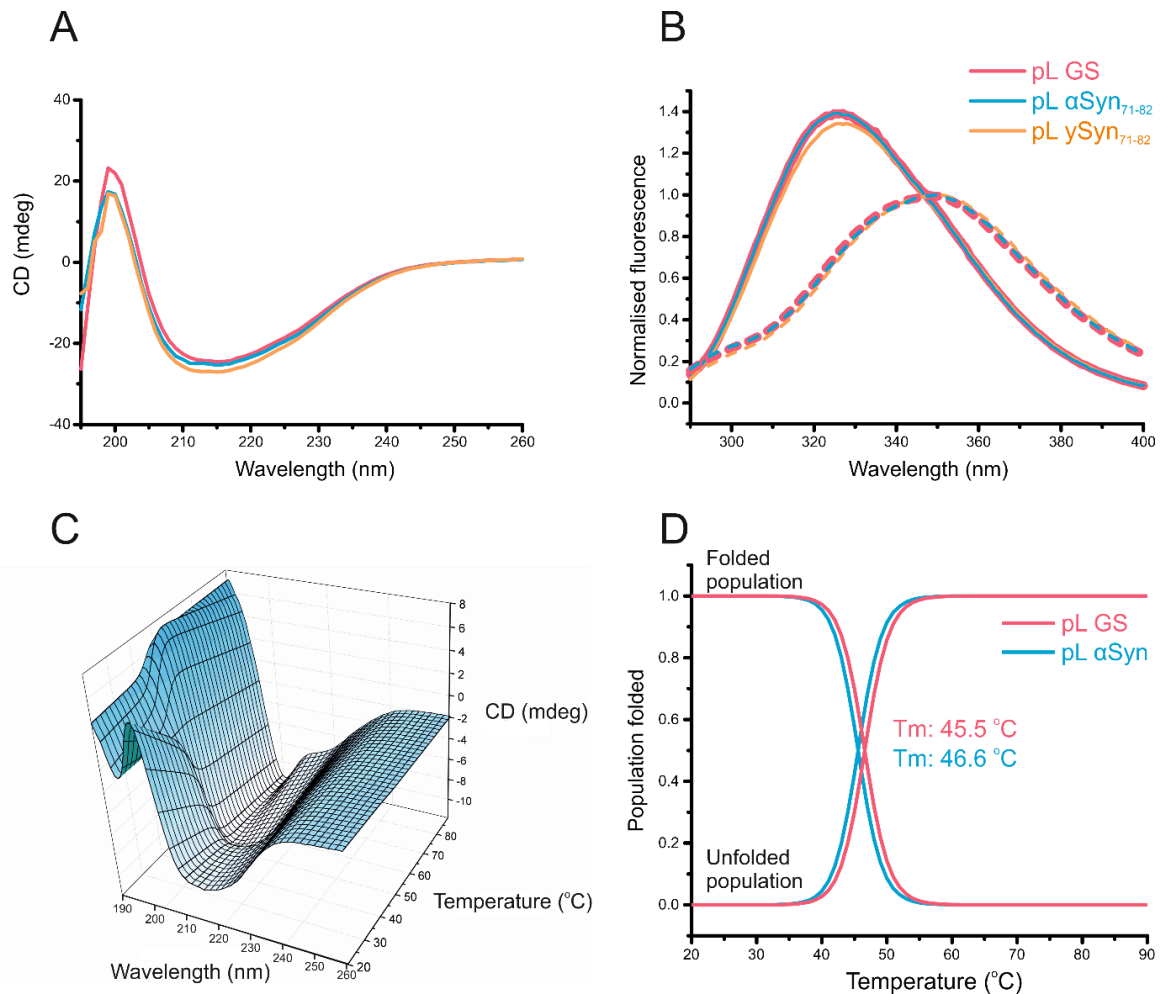

**Figure S4. Spectroscopic analyses of pL variants.**

(A) Far-UV CD spectra of 50  $\mu$ M pL GS (pink); pL  $\alpha$ Syn<sub>71-82</sub> (blue) and pL  $\gamma$ Syn<sub>71-82</sub> (orange). The spectra are similar, exhibiting broad minima from  $\sim$ 210-220 nm, consistent with the mixed  $\alpha/\beta$  topology of folded pL. (B) Intrinsic tryptophan fluorescence emission spectra of pL GS (pink), pL  $\alpha$ Syn<sub>71-82</sub> (blue) and pL  $\gamma$ Syn<sub>71-82</sub> (orange) in the absence (solid lines) or presence of 8M urea (dashed lines). (C) Far UV-CD spectra as a function of temperature for pL  $\alpha$ Syn<sub>71-82</sub>. (D) The relative populations of folded and unfolded conformations of pL  $\alpha$ Syn<sub>71-82</sub> and pL GS (blue and pink respectively) calculated from the global analysis of CD thermal melt data. The  $T_m$  values are shown inset.

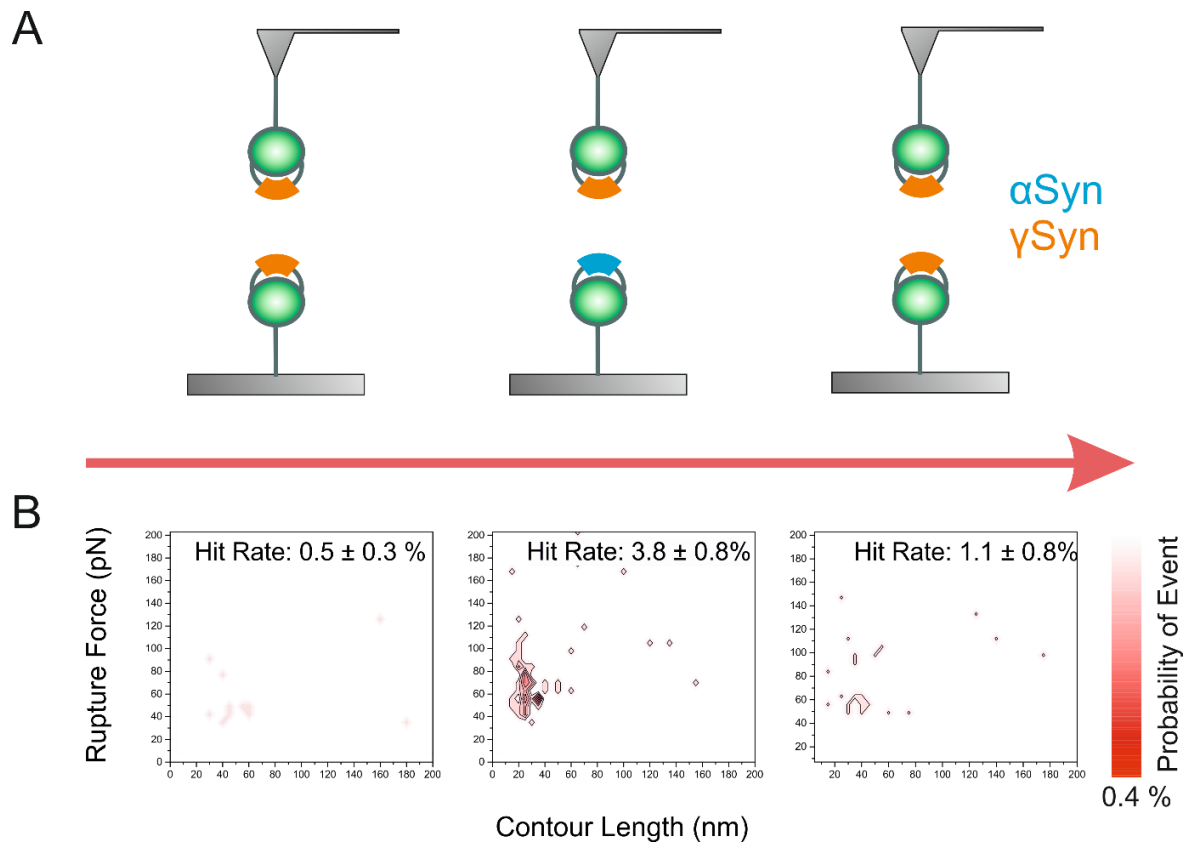

**Figure S5. SMFS experiment showing presence of interaction-competent pL  $\gamma$ Syn<sub>71-82</sub> on the AFM tip.**

(A) Schematic of experimental setup. First the frequency of dissociation of pL  $\gamma$ Syn<sub>71-82</sub> dimers (hit rate) was measured. The surface was then changed to one derivatised with pL  $\alpha$ Syn<sub>71-82</sub> and the frequency of heterodimer dissociation measured. This sample was then replaced by the original pL  $\gamma$ Syn<sub>71-82</sub> functionalised surface and the dissociation frequency measured once more. (B) Contour plots and calculated hit rates from the experiments described in (A). The intra-experimental errors between force maps are shown. The total number of approach retract cycles was 1500 for each different tip and surface pair.

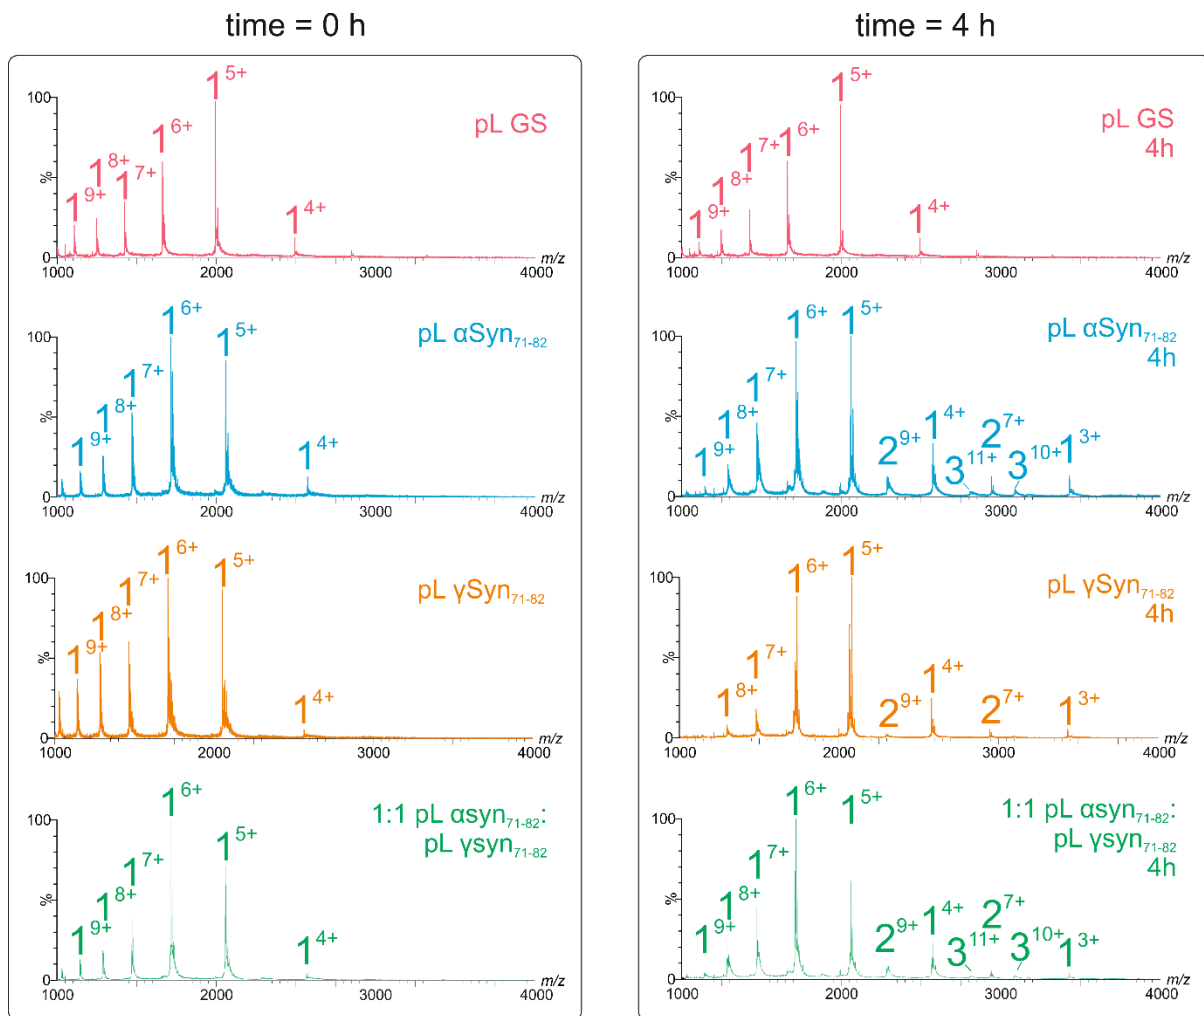

**Figure S6. Native ESI-mass spectra of pL constructs immediately after dilution (t = 0) and after 4 h.**

ESI-mass spectra of pL GS (pink), pL  $\alpha$ Syn<sub>71-82</sub> (blue), pL  $\gamma$ Syn<sub>71-82</sub> (orange) and a 1:1 mix of pL  $\alpha$ Syn<sub>71-82</sub> and pL  $\gamma$ Syn<sub>71-82</sub> (green) at t = 0 (left) and t = 4 h (right). The numbers above the peaks denote the oligomer order, with the positive-charge state of ions in superscript. All variants in isolation and a 1:1 mixture of pL  $\alpha$ Syn<sub>71-82</sub> and pL  $\gamma$ Syn<sub>71-82</sub> were present as monomer at t = 0 (left panel). After 4 h, all variants except the non-aggregating pL GS construct showed self-association (right panel). All samples were diluted to a final total protein concentration of 100  $\mu$ M in 100 mM ammonium acetate buffer, pH 6.8.

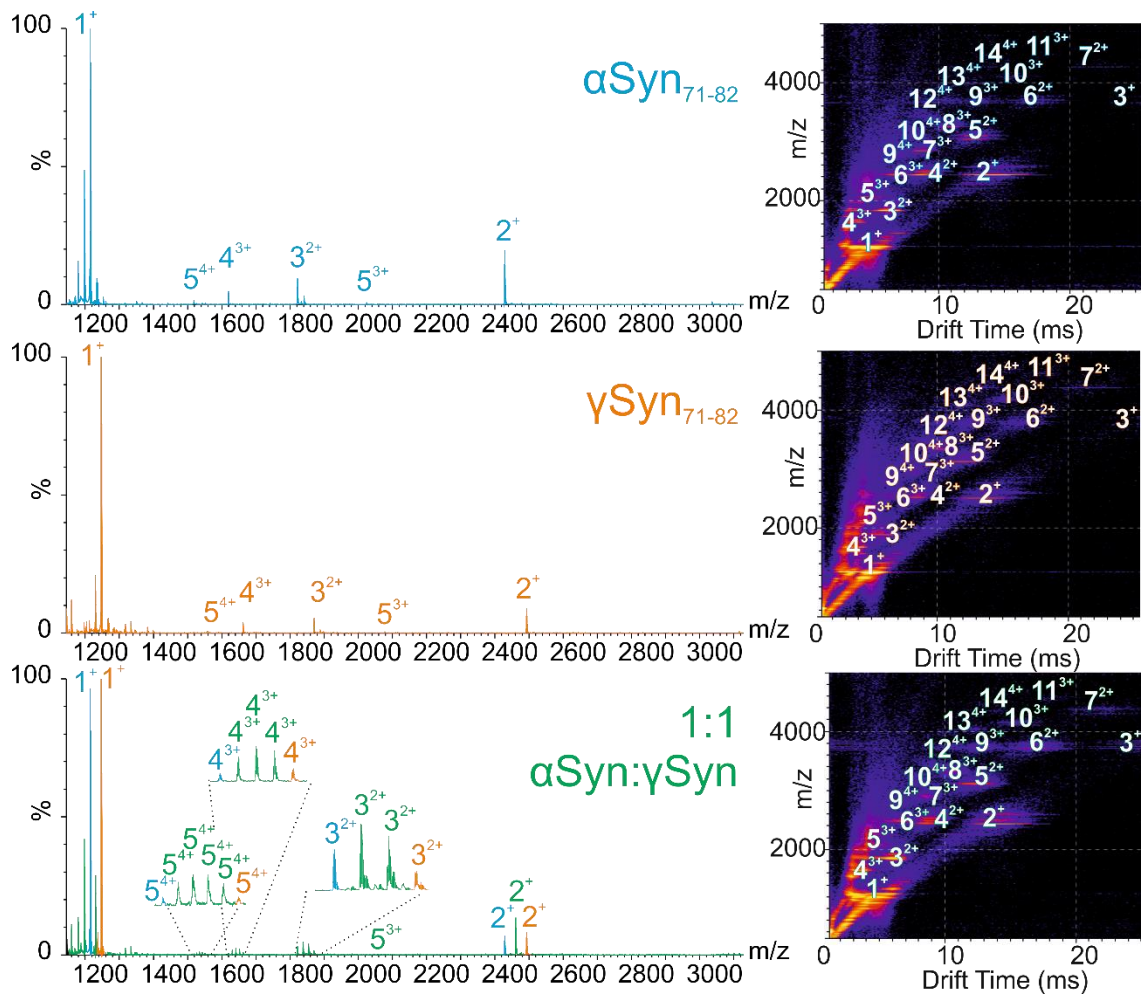

**Figure S7. Mass spectrometric analyses of  $\alpha$ Syn<sub>71-82</sub> and  $\gamma$ Syn<sub>71-82</sub> peptides.**

ESI mass spectra (left) and ESI IMS-MS driftscope plots (right) of  $\alpha$ Syn<sub>71-82</sub> (top),  $\gamma$ Syn<sub>71-82</sub> (middle) and a 1:1 mix of  $\alpha$ Syn<sub>71-82</sub> and  $\gamma$ Syn<sub>71-82</sub> (bottom). The numbers above the peaks denote the oligomer order, with the positive-charge state of ions in superscript. All mass spectra (left) confirm self-association of the peptides up to pentamer, with the 1:1 mix showing a random distribution between the number of  $\alpha$ Syn<sub>71-82</sub> and  $\gamma$ Syn<sub>71-82</sub> monomers in the oligomers. ESI-IMS-MS Driftscope plots (right) show monomeric to tetradecameric species present in all of the samples, two minutes after diluting the monomer to a final peptide concentration of 100  $\mu$ M in 100 mM acetate buffer pH 6.8. ESI-IMS-MS Driftscope plots show the IMS drift time versus mass/charge (m/z) versus intensity (z, square-root scale).

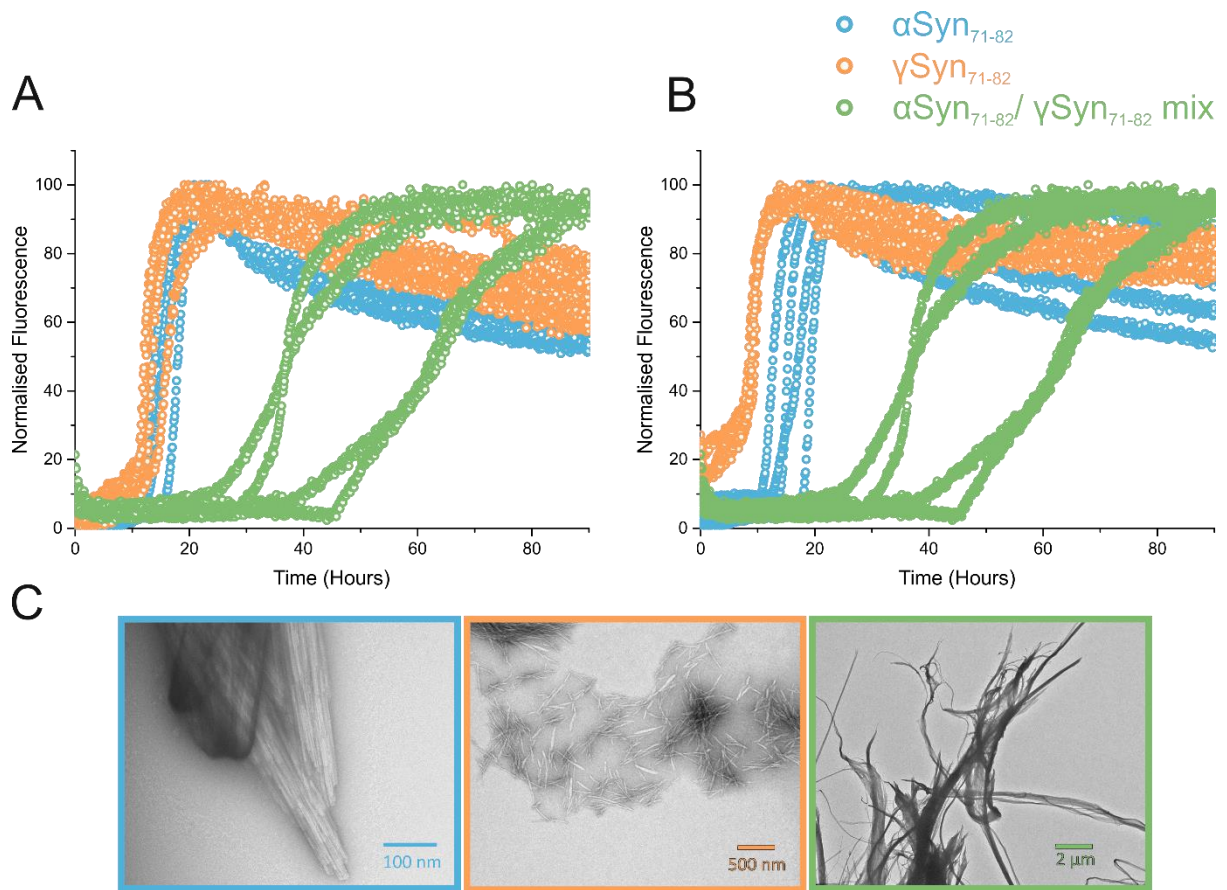

**Figure S8. ThT fluorescence assay of  $\alpha\text{Syn}_{71-82}$  and  $\gamma\text{Syn}_{71-82}$  synthetic peptides.** (A) Normalised fluorescence signal over time of  $225\ \mu\text{M}\ \alpha\text{Syn}_{71-82}$  (blue),  $225\ \mu\text{M}\ \gamma\text{Syn}_{71-82}$  (orange) and the 1:1 mix of  $\alpha\text{Syn}_{71-82}$  and  $\gamma\text{Syn}_{71-82}$  peptides (both at  $225\ \mu\text{M}$ , green). The lag times for  $\alpha\text{Syn}_{71-82}$ ,  $\gamma\text{Syn}_{71-82}$  and for the  $\alpha\text{Syn}_{71-82}:\gamma\text{Syn}_{71-82}$  mixed incubation are  $13.2 \pm 2.1$ ,  $11.8 \pm 1.2$  and  $34.6 \pm 8.5$  h, respectively. (B) Normalised fluorescence signal over time of  $450\ \mu\text{M}\ \alpha\text{Syn}_{71-82}$ ,  $450\ \mu\text{M}\ \gamma\text{Syn}_{71-82}$  and the 1:1 mix of  $\alpha\text{Syn}_{71-82}$  and  $\gamma\text{Syn}_{71-82}$  peptides (both at  $225\ \mu\text{M}$  giving a final peptide concentration of  $450\ \mu\text{M}$ ). Colours denote the same peptides as described in (A). Note: the  $\alpha\text{Syn}_{71-82} + \gamma\text{Syn}_{71-82}$  mix is the same data as presented in (A). The lag times for  $\alpha\text{Syn}_{71-82}$  and  $\gamma\text{Syn}_{71-82}$  are  $13.3 \pm 3.2$  and  $6.1 \pm 1.0$  h, respectively. (C) TEM images taken at the end points (100 h) of the incubations (colour coded as above). All three incubations form fibrillary structures, but with notably different morphology.



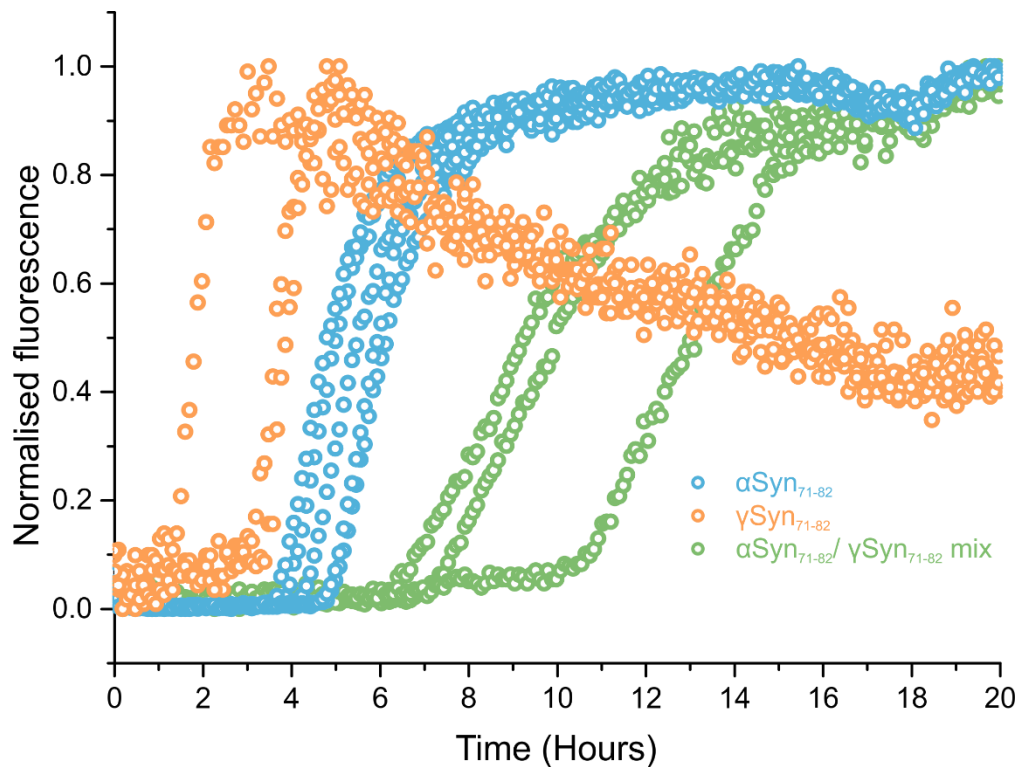

**Figure S9. ThT fluorescence assay of  $\alpha\text{Syn}_{71-82}$  and  $\gamma\text{Syn}_{71-82}$  synthetic peptides in ESI-MS buffer conditions.** Normalised fluorescence signal over time of 225  $\mu\text{M}$   $\alpha\text{Syn}_{71-82}$  (blue), 225  $\mu\text{M}$   $\gamma\text{Syn}_{71-82}$  (orange) and the 1:1 mix of  $\alpha\text{Syn}_{71-82}$  and  $\gamma\text{Syn}_{71-82}$  peptides with a total peptide concentration of 225  $\mu\text{M}$  (both at 112  $\mu\text{M}$ , green). The lag times for  $\alpha\text{Syn}_{71-82}$ ,  $\gamma\text{Syn}_{71-82}$  and for the  $\alpha\text{Syn}_{71-82}:\gamma\text{Syn}_{71-82}$  mixed incubation are  $4.2 \pm 0.6$ ,  $2.5 \pm 1.1$  and  $7.8 \pm 2.0$  h, respectively. ThT experiments presented here were carried out in 100 mM ammonium acetate, pH 6.8 (in line with the ESI-MS experimental conditions).

## Supplementary Tables

| Protein                  | Expected mass Da | Observed mass Da | Mass difference (Da) |
|--------------------------|------------------|------------------|----------------------|
| pL GS                    | 10 100           | 9 967 ± 3        | -133                 |
| pL αSyn <sub>71-82</sub> | 10 390           | 10 257 ± 4       | -132                 |
| pL γSyn <sub>71-82</sub> | 10 423           | 10 290 ± 4       | -133                 |

**Supplementary Table 1. Observed and expected masses from ESI-MS data.** The observed mass is 133 Da below the expected mass as the N-terminal Met residue is excised, due to the activity of the *E. coli* enzyme methionyl-aminopeptidase which has increased activity with decreasing residue size in the penultimate N-terminal position (alanine in this case)(1). Errors are quoted to the nearest Dalton.

## References

1. Hirel PH, Schmitter JM, Dessen P, Fayat G, Blanquet S (1989) Extent of N-terminal methionine excision from *Escherichia coli* proteins is governed by the side-chain length of the penultimate amino-acid. *Proc Natl Acad Sci USA* **86**:8247-8251.
